# Supplementary material
Source: Springer Nature journal article supplement (https://www.springermedizin.de/resource/supplementary/12885_2008_1277_MOESM5_ESM.pdf/9471622)
Supplement: MOESM5 [file 9471622]

Additional file 5

File format: DOC

Title: Genes selected by supervised principal component procedure

Description:

| <b>Gene</b>   | <b>p-value</b> | <b>Hazard Ratio</b> | <b>Lower 95% CL</b> | <b>Upper 95% CL</b> |
|---------------|----------------|---------------------|---------------------|---------------------|
| MELK*         | <.0001         | 2.32                | 1.55                | 3.46                |
| UBE2C         | 0.0004         | 2.17                | 1.41                | 3.33                |
| DIAPH3*       | 0.0002         | 2.04                | 1.41                | 2.95                |
| PKMYT1*       | 0.0001         | 2.01                | 1.40                | 2.88                |
| CONTIG63649RC | 0.0003         | 1.89                | 1.34                | 2.66                |
| NUSAP1        | 0.0026         | 1.83                | 1.24                | 2.71                |
| MYBL2*        | 0.0005         | 1.82                | 1.30                | 2.55                |
| CENPA*        | 0.0005         | 1.81                | 1.29                | 2.52                |
| ESPL1         | 0.0027         | 1.79                | 1.23                | 2.62                |
| CONTIG46218RC | 0.0029         | 1.79                | 1.22                | 2.61                |
| SPOCD1        | 0.0035         | 1.74                | 1.20                | 2.53                |
| FBXO31        | 0.0012         | 1.74                | 1.24                | 2.43                |
| TK1*          | 0.0061         | 1.71                | 1.17                | 2.51                |
| MMP9          | 0.0041         | 1.71                | 1.18                | 2.47                |
| DEPDC1B       | 0.0033         | 1.70                | 1.19                | 2.43                |
| PRR11*        | 0.0013         | 1.69                | 1.23                | 2.34                |
| UBE2S*        | 0.0011         | 1.69                | 1.23                | 2.31                |
| RFC4*         | 0.0010         | 1.68                | 1.23                | 2.28                |
| BUB1*         | 0.0158         | 1.66                | 1.10                | 2.52                |
| CCNE2         | 0.0080         | 1.65                | 1.14                | 2.39                |
| SERF1A        | 0.0006         | 1.61                | 1.23                | 2.12                |
| RHBDF2        | 0.0048         | 1.59                | 1.15                | 2.19                |
| ORC6L*        | 0.0037         | 1.58                | 1.16                | 2.16                |
| RACGAP1*      | 0.0115         | 1.56                | 1.10                | 2.19                |
| KIF2C         | 0.0162         | 1.55                | 1.08                | 2.23                |
| CENPN         | 0.0190         | 1.52                | 1.07                | 2.16                |
| CCNB1*        | 0.0305         | 1.50                | 1.04                | 2.16                |
| DTL           | 0.0246         | 1.49                | 1.05                | 2.10                |
| EBF4          | 0.0253         | 1.47                | 1.05                | 2.07                |
| DC13*         | 0.0136         | 1.46                | 1.08                | 1.98                |
| QSOX2         | 0.0276         | 1.42                | 1.04                | 1.94                |
| SLC2A3        | 0.0219         | 1.41                | 1.05                | 1.90                |
| STK32B        | 0.0364         | 0.73                | 0.54                | 0.98                |
| NAT1          | 0.0136         | 0.70                | 0.53                | 0.93                |
| GSTM1         | 0.0324         | 0.67                | 0.46                | 0.97                |
| NTN4          | 0.0049         | 0.64                | 0.46                | 0.87                |
| ZNF533        | 0.0036         | 0.59                | 0.42                | 0.84                |

\*genes in the 14-gene model from the 37-gene model reduced by LASSO via LARS
